# Supplementary material for: Genome-wide association study of degenerative mitral valve disease in Maltese dogs
Source: PubMed Central journal article supplement — J Vet Sci. 2019 Jan 24;20(1):63–71. doi: 10.4142/jvs.2019.20.1.63 (PMC6351756; doi:10.4142/jvs.2019.20.1.63), 2019-01-24
Supplement: jvs-20-63-s002.pdf [file jvs-20-63-s002.pdf]

**Supplementary Table 2.** *P* values and association parameters for the top 30 SNPs and their gene regions in genome wide association study of ACVIM class, sorted in ascending order of line regression *p* values

| Marker          | Chromosome | Position | Gene name | Variant    | Allele (M > m) | MAF (cases) | MAF (controls) | <i>p</i> value (correlation/trend) | R-value (correlation/trend) | <i>p</i> value (line regression) | Slope (line regression) |
|-----------------|------------|----------|-----------|------------|----------------|-------------|----------------|------------------------------------|-----------------------------|----------------------------------|-------------------------|
| BICF2G630597771 | 32         | 13650453 | CCSER1    | Intron     | G > A          | 0.391       | 0.094          | 0.0001                             | 0.562                       | 0.00003                          | 0.858                   |
| BICF2G630719698 | 1          | 34717853 | AIG1      | Intron     | A > C          | 0.281       | 0.063          | 0.0002                             | 0.549                       | 0.00005                          | 1.055                   |
| BICF2S22955672  | 1          | 31263680 | ABRACL    | Intron     | G > A          | 0.188       | 0.031          | 0.0002                             | 0.541                       | 0.00007                          | 1.134                   |
| BICF2G630113839 | 16         | 31910129 | NRG1      | Intron     | C > T          | 0.313       | 0.063          | 0.0003                             | 0.531                       | 0.0001                           | 0.891                   |
| BICF2S23654432  | 13         | 8847168  | EIF3E     | Intron     | C > A          | 0.094       | 0.000          | 0.0003                             | 0.530                       | 0.0001                           | 1.643                   |
| BICF2S2348307   | 5          | 21285791 | ALG9      | Intron     | G > C          | 0.234       | 0.031          | 0.0003                             | 0.527                       | 0.0001                           | 1.053                   |
| BICF2P344497    | 16         | 53450034 | WDR17     | Promotor   | C > A          | 0.500       | 0.250          | 0.0003                             | 0.527                       | 0.0001                           | 0.787                   |
| BICF2P826959    | 17         | 20219378 | RAB10     | Intron     | A > G          | 0.203       | 0.031          | 0.0003                             | 0.527                       | 0.0001                           | 1.189                   |
| BICF2P792699    | 17         | 20242118 | RAB10     | Intron     | G > A          | 0.203       | 0.031          | 0.0003                             | 0.527                       | 0.0001                           | 1.189                   |
| BICF2P635675    | 17         | 20254811 | RAB10     | Intron     | G > A          | 0.203       | 0.031          | 0.0003                             | 0.527                       | 0.0001                           | 1.189                   |
| BICF2P844340    | 17         | 20269538 | RAB10     | Downstream | T > A          | 0.203       | 0.031          | 0.0003                             | 0.527                       | 0.0001                           | 1.189                   |
| BICF2G630597735 | 32         | 13669627 | CCSER1    | Intron     | T > A          | 0.297       | 0.094          | 0.0003                             | 0.527                       | 0.0001                           | 1.003                   |
| BICF2S23531583  | 26         | 29367235 | ARVCF     | Promotor   | T > C          | 0.172       | 0.438          | 0.0004                             | -0.519                      | 0.0002                           | -0.922                  |
| BICF2P1290654   | 6          | 7954357  | CUX1      | Intron     | T > C          | 0.375       | 0.156          | 0.0004                             | 0.514                       | 0.0002                           | 0.927                   |
| BICF2G630155016 | 27         | 44221153 | CACNA1C   | Intron     | G > A          | 0.484       | 0.250          | 0.0004                             | 0.513                       | 0.0002                           | 0.698                   |
| BICF2G630155028 | 27         | 44246648 | CACNA1C   | Intron     | A > G          | 0.484       | 0.250          | 0.0004                             | 0.513                       | 0.0002                           | 0.698                   |
| BICF2G630155029 | 27         | 44248683 | CACNA1C   | Intron     | T > C          | 0.484       | 0.250          | 0.0004                             | 0.513                       | 0.0002                           | 0.698                   |
| BICF2G630155030 | 27         | 44254253 | CACNA1C   | Intron     | G > A          | 0.484       | 0.250          | 0.0004                             | 0.513                       | 0.0002                           | 0.698                   |
| BICF2G630155042 | 27         | 44277814 | CACNA1C   | Intron     | T > C          | 0.484       | 0.250          | 0.0004                             | 0.513                       | 0.0002                           | 0.698                   |
| BICF2G630155011 | 27         | 44213022 | CACNA1C   | Intron     | T > C          | 0.500       | 0.250          | 0.0004                             | 0.513                       | 0.0002                           | 0.706                   |
| BICF2G630155032 | 27         | 44257504 | CACNA1C   | Intron     | A > G          | 0.500       | 0.250          | 0.0004                             | 0.513                       | 0.0002                           | 0.706                   |
| BICF2G630155044 | 27         | 44278322 | CACNA1C   | Intron     | C > T          | 0.500       | 0.250          | 0.0004                             | 0.513                       | 0.0002                           | 0.706                   |
| BICF2S22952579  | 16         | 31914602 | NRG1      | Intron     | C > T          | 0.266       | 0.031          | 0.0005                             | 0.509                       | 0.0002                           | 0.825                   |
| BICF2S23913673  | 32         | 13735479 | CCSER1    | Intron     | A > G          | 0.313       | 0.125          | 0.0005                             | 0.508                       | 0.0002                           | 0.964                   |
| BICF2P115550    | 1          | 36878165 | EPM2A     | Intron     | C > T          | 0.359       | 0.719          | 0.0005                             | -0.505                      | 0.0003                           | -0.733                  |
| BICF2S2335909   | 32         | 13567826 | CCSER1    | Intron     | T > C          | 0.391       | 0.125          | 0.0005                             | 0.504                       | 0.0003                           | 0.739                   |
| BICF2G630847123 | 16         | 14810816 | ATP6V0E2  | Intron     | C > G          | 0.188       | 0.031          | 0.0006                             | 0.504                       | 0.0003                           | 1.163                   |
| BICF2G630847146 | 16         | 14825580 | ATP6V0E2  | Promotor   | C > A          | 0.188       | 0.031          | 0.0006                             | 0.504                       | 0.0003                           | 1.163                   |
| BICF2G630716870 | 1          | 30536547 | KIAA1244  | Intron     | G > A          | 0.313       | 0.625          | 0.0006                             | -0.501                      | 0.0003                           | -0.782                  |
| BICF2G630765420 | 36         | 4140801  | CCDC148   | Intron     | C > A          | 0.391       | 0.688          | 0.0006                             | -0.500                      | 0.0003                           | -0.711                  |

SNP, single nucleotide polymorphism; M > m, major allele to minor allele; MAF, minor allele frequency; Promotor, a variant is located 5' of a gene within 5,000 bases; Downstream, a variant located 3' of a gene within 5,000 bases.
