# Supplementary material for: Genome-wide association study of degenerative mitral valve disease in Maltese dogs
Source: PubMed Central journal article supplement — J Vet Sci. 2019 Jan 24;20(1):63–71. doi: 10.4142/jvs.2019.20.1.63 (PMC6351756; doi:10.4142/jvs.2019.20.1.63), 2019-01-24
Supplement: jvs-20-63-s003.pdf [file jvs-20-63-s003.pdf]

**Supplementary Table 3.** *P* values and association parameters for the top 30 SNPs and their gene regions in genome wide association study of presence of MVP, sorted in ascending order of allelic *p* values

| Marker          | Chromosome | Position | Gene name | Variant    | Allele (M > m) | MAF (cases) | MAF (controls) | OR (95% CI)      | <i>p</i> value (alleles) | <i>p</i> value (genotype) | <i>p</i> value (linear regression) |
|-----------------|------------|----------|-----------|------------|----------------|-------------|----------------|------------------|--------------------------|---------------------------|------------------------------------|
| BICF2S22953701  | 24         | 35459972 | PREX1     | Intron     | A > G          | 0.516       | 0.219          | 4.9 (1.8–13.3)   | 0.00004                  | 0.00001                   | 0.000002                           |
| BICF2G630719698 | 1          | 34717853 | AIG1      | Intron     | A > C          | 0.281       | 0.063          | 22.1 (2.9–168.2) | 0.0004                   | 0.0001                    | 0.00003                            |
| BICF2G630847123 | 16         | 14810816 | ATP6V0E2  | Intron     | C > G          | 0.188       | 0.031          | 3.5 (1.6–7.9)    | 0.001                    | 0.0005                    | 0.0001                             |
| BICF2G630847146 | 16         | 14825580 | ATP6V0E2  | Promotor   | C > A          | 0.188       | 0.031          | 5.6 (1.9–16.9)   | 0.001                    | 0.0005                    | 0.0001                             |
| BICF2P677273    | 17         | 1889414  | TSSC1     | Intron     | C > T          | 0.391       | 0.063          | 6.2 (2–19.8)     | 0.000008                 | 0.0002                    | 0.0002                             |
| BICF2S23028719  | 34         | 19270341 | FETUB     | Intron     | G > A          | 0.156       | 0.031          | 6.2 (2–19.8)     | 0.0005                   | 0.0006                    | 0.0002                             |
| BICF2G630847762 | 16         | 15628450 | PRKAG2    | Intron     | C > T          | 0.141       | 0.031          | 15.2 (3.5–65.8)  | 0.001                    | 0.0006                    | 0.0003                             |
| BICF2P389796    | 23         | 48297678 | ARHGGEF26 | Intron     | G > A          | 0.109       | 0.281          | 21.1 (2.4–187.5) | 0.002                    | 0.002                     | 0.0003                             |
| BICF2G630777293 | 35         | 20097889 | SOX4      | Promotor   | G > A          | 0.422       | 0.500          | 9.6 (2.2–41.8)   | 0.001                    | 0.001                     | 0.0003                             |
| BICF2P932119    | 4          | 17368888 | CTNNA3    | Downstream | T > C          | 0.391       | 0.125          | 5.7 (1.5–21.5)   | 0.0004                   | 0.001                     | 0.0003                             |
| BICF2P739518    | 4          | 17382382 | CTNNA3    | Intron     | C > T          | 0.391       | 0.125          | 3.7 (1.5–9.2)    | 0.0004                   | 0.001                     | 0.0003                             |
| BICF2G630813604 | 16         | 45227982 | UFSP2     | Downstream | T > A          | 0.344       | 0.125          | 3.7 (1.5–9.2)    | 0.0001                   | 0.001                     | 0.0003                             |
| BICF2P618015    | 17         | 6196342  | MBOAT2    | Intron     | C > T          | 0.234       | 0.063          | 5.9 (1.9–18.6)   | 0.0005                   | 0.002                     | 0.0004                             |
| BICF2G630460824 | 34         | 24262493 | IQCJ      | Intron     | T > C          | 0.453       | 0.125          | 6.3 (1.9–20.6)   | 0.0008                   | 0.0005                    | 0.0004                             |
| BICF2P134702    | 4          | 18127172 | CTNNA3    | Intron     | A > C          | 0.375       | 0.125          | 4.2 (1.6–11.3)   | 0.0009                   | 0.0009                    | 0.0005                             |
| BICF2G630765420 | 36         | 4140801  | CCDC148   | Intron     | C > A          | 0.391       | 0.688          | 4.2 (1.6–11.3)   | 0.002                    | 0.002                     | 0.0008                             |
| BICF2G630576688 | 6          | 49783656 | DBT       | Intron     | C > T          | 0.359       | 0.063          | 4.2 (1.6–11.3)   | 0.001                    | 0.003                     | 0.0008                             |
| BICF2G630780037 | 35         | 23781532 | SLC17A1   | Intron     | T > C          | 0.156       | 0.031          | 4.2 (1.6–11.3)   | 0.001                    | 0.002                     | 0.0008                             |
| BICF2S23539509  | 17         | 2058552  | TRAPPC12  | Intron     | G > A          | 0.468       | 0.188          | 4.2 (1.6–11.3)   | 0.00005                  | 0.002                     | 0.0009                             |
| BICF2G630369796 | 23         | 44154775 | TM4SF1    | Intron     | A > G          | 0.531       | 0.375          | 0.2 (0–0.5)      | 0.001                    | 0.007                     | 0.001                              |
| BICF2P241728    | 1          | 24795748 | LDLRAD4   | Intron     | C > T          | 0.094       | 0.344          | 23.4 (2.6–209.3) | 0.002                    | 0.01                      | 0.001                              |
| BICF2G630155016 | 27         | 44221153 | CACNA1C   | Intron     | G > A          | 0.484       | 0.250          | 16.9 (1.9–149.9) | 0.001                    | 0.008                     | 0.001                              |
| BICF2G630155028 | 27         | 44246648 | CACNA1C   | Intron     | A > G          | 0.484       | 0.250          | 17.2 (3.1–94.5)  | 0.001                    | 0.008                     | 0.001                              |
| BICF2G630155029 | 27         | 44248683 | CACNA1C   | Intron     | T > C          | 0.484       | 0.250          | 17.2 (3.1–94.5)  | 0.001                    | 0.008                     | 0.001                              |
| BICF2G630155030 | 27         | 44254253 | CACNA1C   | Intron     | G > A          | 0.484       | 0.250          | 3.9 (1.5–9.9)    | 0.001                    | 0.008                     | 0.001                              |
| BICF2G630155042 | 27         | 44277814 | CACNA1C   | Intron     | T > C          | 0.484       | 0.250          | 5.7 (1.8–18.4)   | 0.001                    | 0.008                     | 0.001                              |
| BICF2G63069877  | 38         | 17960385 | LMX1A     | Intron     | C > T          | 0.531       | 0.438          | 4.3 (1.6–11.5)   | 0.001                    | 0.009                     | 0.001                              |
| BICF2P281121    | 1          | 24617129 | LDLRAD4   | NMD_trans  | C > T          | 0.563       | 0.250          | 0.2 (0–0.7)      | 0.0007                   | 0.005                     | 0.002                              |
| BICF2G630791371 | 1          | 83354309 | TRPM6     | Intron     | C > T          | 0.578       | 0.219          | 0.2 (0.1–0.6)    | 0.0007                   | 0.01                      | 0.002                              |
| BICF2P1030134   | 17         | 7287630  | HPCAL1    | Intron     | T > C          | 0.250       | 0.031          | 0.1 (0–0.5)      | 0.0005                   | 0.006                     | 0.002                              |

SNP, single nucleotide polymorphism; MVP, mitral valve prolapse; M > m, major allele to minor allele; MAF, minor allele frequency; Promotor, a variant is located 5' of a gene within 5,000 bases; Downstream, a variant located 3' of a gene within 5,000 bases; NMD\_trans, a variant in a transcript that is already the target of nonsense-mediated decay (NMD), i.e. stop codon is not in last exon nor within 50 bases of the end of the second-to-last exon.
