# Supplementary material for: Genome-wide association study of degenerative mitral valve disease in Maltese dogs
Source: PubMed Central journal article supplement — J Vet Sci. 2019 Jan 24;20(1):63–71. doi: 10.4142/jvs.2019.20.1.63 (PMC6351756; doi:10.4142/jvs.2019.20.1.63), 2019-01-24
Supplement: jvs-20-63-s004.pdf [file jvs-20-63-s004.pdf]

**Supplementary Table 4.** *P* values and association parameters for the top 30 SNPs and their gene regions in genome wide association study of presence of leukocytosis, sorted in ascending order of allelic *p* values

| Marker          | Chromosome | Position | Gene name | Variant     | Allele (M > m) | MAF (cases) | MAF (control) | OR (95% CI)       | <i>p</i> value (alleles) | <i>p</i> value (genotype) | <i>p</i> value (linear regression) |
|-----------------|------------|----------|-----------|-------------|----------------|-------------|---------------|-------------------|--------------------------|---------------------------|------------------------------------|
| BICF2S23731803  | 29         | 28008653 | ZNF704    | Intron      | G > A          | 0.375       | 0.219         | 15.2 (1.9–124.5)  | 0.0002                   | 0.001                     | 0.0003                             |
| BICF2P360314    | 14         | 59117383 | CPED1     | Intron      | G > T          | 0.203       | 0.313         | 12.3 (1.7–87.1)   | 0.0002                   | 0.005                     | 0.0009                             |
| BICF2P409762    | 23         | 46354770 | AADAC     | Intron      | C > T          | 0.156       | 0.156         | 85.7 (4.6–1608.3) | 0.0002                   | 0.0003                    | 0.00005                            |
| BICF2P158364    | 14         | 59109058 | CPED1     | Intron      | C > A          | 0.172       | 0.313         | 10.9 (1.3–93.4)   | 0.0002                   | 0.005                     | 0.002                              |
| TIGRP2P178665   | 13         | 44472531 | FRYL      | Intron      | G > T          | 0.484       | 0.344         | 0.1 (0–0.6)       | 0.0005                   | 0.009                     | 0.0006                             |
| BICF2P427858    | 18         | 16480966 | RELN      | Intron      | G > A          | 0.359       | 0.531         | 12.7 (1.6–98.8)   | 0.0009                   | 0.002                     | 0.0009                             |
| BICF2P693293    | 35         | 17037652 | DEK       | Intron      | T > C          | 0.359       | 0.469         | 6.9 (1.5–31.4)    | 0.0009                   | 0.008                     | 0.003                              |
| BICF2P192591    | 17         | 54399594 | CD101     | Promotor    | C > T          | 0.438       | 0.406         | 0.1 (0–0.7)       | 0.001                    | 0.02                      | 0.002                              |
| BICF2S23642683  | 10         | 62058722 | COMMD1    | 3' UTR      | A > G          | 0.422       | 0.469         | 0.1 (0–0.7)       | 0.001                    | 0.005                     | 0.0009                             |
| BICF2P205119    | 23         | 51723523 | RSRC1     | Intron      | G > T          | 0.469       | 0.375         | 8.2 (1.5–46)      | 0.001                    | 0.002                     | 0.002                              |
| TIGRP2P178653   | 13         | 44442703 | FRYL      | Intron      | G > A          | 0.531       | 0.406         | 13 (1.8–95)       | 0.001                    | 0.01                      | 0.002                              |
| BICF2P1349041   | 5          | 22674087 | ZC3H12C   | Intron      | T > C          | 0.234       | 0.313         | 17.3 (1.8–166.7)  | 0.002                    | 0.003                     | 0.0009                             |
| BICF2P686334    | 35         | 2120293  | GMDS      | Intron      | A > C          | 0.250       | 0.094         | 3.3 (1.1–9.3)     | 0.002                    | 0.003                     | 0.0009                             |
| BICF2G630202095 | 17         | 49247030 | DUSP11    | Intron      | A > G          | 0.313       | 0.313         | 17.3 (1.8–166.7)  | 0.002                    | 0.03                      | 0.02                               |
| BICF2P634344    | 4          | 73231391 | PRLR      | Intron      | T > C          | 0.453       | 0.344         | 5.7 (1.4–24)      | 0.002                    | 0.02                      | 0.005                              |
| BICF2G630136177 | 37         | 30897806 | CLN8      | Intron      | T > A          | 0.281       | 0.094         | 6.5 (1.4–29.5)    | 0.002                    | 0.008                     | 0.001                              |
| TIGRP2P118688   | 8          | 63235556 | PPP4R4    | Intron      | C > T          | 0.203       | 0.156         | 10 (1.5–65.4)     | 0.003                    | 0.008                     | 0.003                              |
| BICF2P1194681   | 12         | 10053247 | NCR2      | Intron      | C > T          | 0.344       | 0.438         | 10 (1.5–65.4)     | 0.003                    | 0.008                     | 0.003                              |
| BICF2P186881    | 18         | 43730865 | CHST1     | Intron      | A > G          | 0.438       | 0.406         | 0.1 (0–0.9)       | 0.003                    | 0.03                      | 0.004                              |
| BICF2S23637714  | 31         | 25290094 | KRTAP15-1 | Intron      | C > T          | 0.422       | 0.375         | 0 (0–0.5)         | 0.003                    | 0.01                      | 0.0008                             |
| BICF2P446760    | 13         | 38583430 | LIMCH1    | Intron      | A > G          | 0.469       | 0.313         | 0.1 (0–1)         | 0.003                    | 0.04                      | 0.007                              |
| BICF2P1029983   | 18         | 16472126 | RELN      | Intron      | G > A          | 0.313       | 0.438         | 14 (1.6–125.9)    | 0.004                    | 0.007                     | 0.002                              |
| BICF2G630368171 | 23         | 45718686 | MED12L    | Intron      | C > T          | 0.297       | 0.250         | 14 (1.6–125.9)    | 0.004                    | 0.007                     | 0.002                              |
| TIGRP2P255581   | 18         | 46923214 | NAP1L4    | Downstream  | G > A          | 0.328       | 0.250         | 6.7 (1.4–33)      | 0.004                    | 0.02                      | 0.006                              |
| BICF2S2309194   | 1          | 68658546 | SAMD3     | Downstream  | C > T          | 0.453       | 0.344         | 0.1 (0–0.7)       | 0.004                    | 0.02                      | 0.005                              |
| TIGRP2P178488   | 13         | 43751269 | NFXL1     | Intron      | G > A          | 0.516       | 0.406         | 0.1 (0–0.6)       | 0.004                    | 0.009                     | 0.001                              |
| BICF2P1186789   | 13         | 43753527 | NFXL1     | Intron      | A > T          | 0.516       | 0.406         | 4.5 (1.2–16.5)    | 0.004                    | 0.009                     | 0.001                              |
| BICF2P878006    | 13         | 43783081 | NFXL1     | CDS (A604A) | T > C          | 0.516       | 0.406         | 16.4 (1.7–160.9)  | 0.004                    | 0.009                     | 0.001                              |
| TIGRP2P178533   | 13         | 43842335 | CNGA1     | Intron      | G > A          | 0.453       | 0.531         | 5.7 (1.3–25.1)    | 0.004                    | 0.009                     | 0.001                              |
| BICF2P475301    | 3          | 50082580 | AGBL1     | NMD_trans   | A > G          | 0.375       | 0.281         | 0.1 (0–0.6)       | 0.004                    | 0.01                      | 0.003                              |

SNP, single nucleotide polymorphism; M > m, major allele to minor allele; MAF, minor allele frequency; Promotor, a variant is located 5' of a gene within 5,000 bases; 3' UTR, the variant located in the 3' untranslated region (UTR) of a gene; Downstream, a variant located 3' of a gene within 5,000 bases; CDS, the variant located in coding sequence region of a gene; NMD\_trans, a variant in a transcript that is already the target of nonsense-mediated decay (NMD).
