# Supplementary material for: Genome-wide association study of degenerative mitral valve disease in Maltese dogs
Source: PubMed Central journal article supplement — J Vet Sci. 2019 Jan 24;20(1):63–71. doi: 10.4142/jvs.2019.20.1.63 (PMC6351756; doi:10.4142/jvs.2019.20.1.63), 2019-01-24
Supplement: jvs-20-63-s005.pdf [file jvs-20-63-s005.pdf]

**Supplementary Table 5.** *P* values and association parameters for the top 30 SNPs and their gene regions in genome wide association study of presence of thrombocytosis, sorted in ascending order of allelic *p* values

| Marker          | Chromosome | Position | Gene name | Variant      | Allele (M > m) | MAF (cases) | MAF (controls) | OR (95% CI)      | <i>p</i> value (alleles) | <i>p</i> value (genotype) | <i>p</i> value (linear regression) |
|-----------------|------------|----------|-----------|--------------|----------------|-------------|----------------|------------------|--------------------------|---------------------------|------------------------------------|
| BICF2P802523    | 1          | 68048836 | LAMA2     | Intron       | G > A          | 0.453       | 0.313          | 0 (0-0.4)        | 0.0002                   | 0.001                     | 0.00008                            |
| BICF2S2352812   | 23         | 38926132 | SLC9A9    | Intron       | T > C          | 0.344       | 0.438          | 3.6 (1.3-10)     | 0.0003                   | 0.02                      | 0.007                              |
| BICF2S23542873  | 1          | 68063413 | LAMA2     | Intron       | G > A          | 0.438       | 0.313          | 0.1 (0-0.5)      | 0.0007                   | 0.005                     | 0.0004                             |
| BICF2P254642    | 6          | 26237831 | SMG1      | Intron       | A > G          | 0.359       | 0.313          | 0.1 (0-0.7)      | 0.0007                   | 0.02                      | 0.001                              |
| BICF2P1067537   | 6          | 26265164 | SMG1      | CDS (L1442L) | A > G          | 0.359       | 0.313          | 0.1 (0-0.7)      | 0.0007                   | 0.02                      | 0.001                              |
| BICF2S22951013  | 30         | 36585555 | NEO1      | Intron       | G > A          | 0.188       | 0.281          | 10.1 (1.2-87.9)  | 0.0008                   | 0.01                      | 0.003                              |
| BICF2P476932    | 18         | 25561545 | ANO9      | Intron       | T > C          | 0.422       | 0.656          | 14.1 (1.7-116.5) | 0.0009                   | 0.004                     | 0.0005                             |
| BICF2P306308    | 27         | 32508403 | GRIN2B    | Intron       | T > C          | 0.438       | 0.313          | 0.1 (0-0.5)      | 0.001                    | 0.008                     | 0.0005                             |
| BICF2P892936    | 17         | 34151426 | MTA3      | Intron       | A > G          | 0.172       | 0.188          | 17.7 (2.1-145.7) | 0.001                    | 0.003                     | 0.0007                             |
| BICF2P315620    | 17         | 34250535 | MTA3      | CDS (D240D)  | C > T          | 0.172       | 0.188          | 5.7 (1.2-26.4)   | 0.001                    | 0.003                     | 0.0007                             |
| BICF2P1043430   | 17         | 34285735 | MTA3      | Intron       | C > T          | 0.172       | 0.188          | 9.1 (1.5-56.3)   | 0.001                    | 0.003                     | 0.0007                             |
| BICF2P1090053   | 11         | 24959634 | SPOCK1    | Intron       | T > C          | 0.203       | 0.250          | 17.7 (2.1-145.7) | 0.001                    | 0.008                     | 0.002                              |
| BICF2S23353659  | 11         | 40088521 | MLLT3     | Downstream   | G > A          | 0.250       | 0.344          | 17.7 (2.1-145.7) | 0.001                    | 0.01                      | 0.006                              |
| BICF2S2321031   | 2          | 56654634 | ARHGEF28  | Intron       | G > A          | 0.313       | 0.188          | 8.2 (1.6-42)     | 0.001                    | 0.004                     | 0.0005                             |
| BICF2P1465211   | 2          | 56728504 | ARHGEF28  | Intron       | G > A          | 0.297       | 0.219          | 17.5 (1.9-163.3) | 0.001                    | 0.009                     | 0.002                              |
| BICF2G630247561 | 33         | 7961740  | PCNP      | Promotor     | C > T          | 0.406       | 0.281          | 0.1 (0-0.6)      | 0.001                    | 0.01                      | 0.001                              |
| BICF2G630189318 | 5          | 47834654 | KANK4     | Intron       | A > G          | 0.375       | 0.219          | 0 (0-0.4)        | 0.002                    | 0.004                     | 0.0004                             |
| BICF2G630189330 | 5          | 47838346 | KANK4     | 3' UTR       | A > G          | 0.375       | 0.219          | 0 (0-0.4)        | 0.002                    | 0.004                     | 0.0004                             |
| BICF2P704885    | 6          | 26206588 | SMG1      | Intron       | T > C          | 0.328       | 0.281          | 0.1 (0-0.6)      | 0.002                    | 0.02                      | 0.001                              |
| BICF2P423478    | 6          | 26218520 | SMG1      | Intron       | A > G          | 0.328       | 0.281          | 0.1 (0-0.6)      | 0.002                    | 0.02                      | 0.001                              |
| BICF2P912268    | 17         | 34165681 | MTA3      | Intron       | G > A          | 0.203       | 0.188          | 25.9 (2.4-281.5) | 0.002                    | 0.002                     | 0.0003                             |
| BICF2G630554507 | 7          | 27893234 | MROH9     | Intron       | T > G          | 0.391       | 0.406          | 12.4 (1.6-97.7)  | 0.002                    | 0.007                     | 0.001                              |
| BICF2P118756    | 28         | 29891072 | INPP5F    | Intron       | C > T          | 0.344       | 0.375          | 12.4 (1.6-95.6)  | 0.002                    | 0.006                     | 0.0008                             |
| BICF2P1167338   | 28         | 29915313 | INPP5F    | Intron       | C > T          | 0.344       | 0.375          | 12.4 (1.6-95.6)  | 0.002                    | 0.006                     | 0.0008                             |
| BICF2P1455766   | 21         | 10748290 | NOX4      | Intron       | A > G          | 0.406       | 0.438          | 0.1 (0-0.5)      | 0.002                    | 0.009                     | 0.0006                             |
| BICF2P1167348   | 6          | 26228768 | SMG1      | Promotor     | G > T          | 0.391       | 0.344          | 0.1 (0-0.6)      | 0.002                    | 0.01                      | 0.002                              |
| BICF2P399880    | 24         | 37670948 | NFATC2    | Intron       | A > G          | 0.438       | 0.500          | 14.2 (1.7-122.1) | 0.002                    | 0.006                     | 0.0008                             |
| BICF2G630583531 | 6          | 32575445 | GRIN2A    | Intron       | T > C          | 0.172       | 0.313          | 49 (3.8-637.8)   | 0.003                    | 0.0007                    | 0.0002                             |
| BICF2G630584076 | 6          | 31739230 | CLEC16A   | Intron       | A > T          | 0.125       | 0.281          | 23.9 (2.1-276)   | 0.003                    | 0.004                     | 0.001                              |
| BICF2S23218636  | 2          | 30464167 | NET1      | Promotor     | T > C          | 0.547       | 0.344          | 0.2 (0.1-0.8)    | 0.003                    | 0.05                      | 0.007                              |

SNP, single nucleotide polymorphism; M > m, major allele to minor allele; MAF, minor allele frequency; CDS, the variant located in coding sequence region of a gene; Downstream, a variant located 3' of a gene within 5,000 bases; Promotor, a variant is located 5' of a gene within 5,000 bases; 3' UTR, the variant located in the 3' untranslated region (UTR) of a gene.
